# Supplementary material
Source: Research Square preprint supplement (doi:10.21203/rs.3.rs-10118732/v1)
Supplement: Supplementary file 1 [file c940c27129e6fbfba1354972.docx]

Agronomy for Sustainable Development (Springer)

**The Role of Indigenous Minor Crops in Enhancing Food Security and Climate Resilience among Smallholder Farmers in Ghana**

Jeannette Aduhene-Chinbuah *1,2 (ORCID- 0009-0009-3714-6031), Clement Oppong Peprah1, Felix Frimpong1,5, Hillary Mireku Botey1,5, Kwesi Atta Senior Aidoo1, Eric Owusu Danquah1, Yaa Pokuaa3, Patrick Opoku2, Christian Opoku Kwarteng4, Lisa Konadu Boateng1, Patricia Pinamang Acheampong¹, Ernest Baafi¹,5, Maxwell Darko Asante1,5

1. Council for Scientific and Industrial Research, Crops Research Institute, Fumesua, Kumasi, Ghana.
2. Kwame Nkrumah University of Science and Technology, Kumasi, Ghana.
3. Ministry of Food and Agriculture, Ghana
4. Council for Scientific and Industrial Research, Forestry Research Institute of Ghana, Fumesua, Kumasi, Ghana.
5. CSIR-College of Science and Technology, Department of Plant Resources Development, Faculty of Natural Sciences and Environmental Management, Kumasi, Ghana

Corresponding author: *Jeannette Aduhene-Chinbuah (jeanamene@gmail.com)

**Supplementary Table 1:** One-way ANOVA results for the effect of crop diversity on hunger-gap duration (*SS*= sum of squares; *df* = degrees of freedom; *MS*= mean square; One-way ANOVA comparing crop diversity (4 groups) to dietary diversity score with N=750)

| **Source** | **SS** | **df** | **MS** | **F** | **P-value** |
| --- | --- | --- | --- | --- | --- |
| Between groups | 640.18 | 3 | 213.39 | 64.49 | <0.001 |
| Within groups | 2467.52 | 746 | 3.31 |  |  |
| **Total** | **3107.7** | **749** |  |  |  |

**Supplementary Table 2**: One-way ANOVA results for the effect of crop diversity on dietary diversity score (*SS*= sum of squares; *df* = degrees of freedom; *MS*= mean square; One-way ANOVA comparing crop diversity (4 groups) to dietary diversity score with N=750)

| **Source** | **SS** | **df** | **MS** | **F** | **P-value** |
| --- | --- | --- | --- | --- | --- |
| Between groups | 640.18 | 3 | 213.39 | 64.49 | <0.001 |
| Within groups | 2467.52 | 746 | 3.31 |  |  |
| **Total** | **3107.70** | **749** |  |  |  |
